# Supplementary material for: Extension of the minimal functional unit of the RNA polymerase II CTD from yeast to mammalian cells
Source: PubMed Central journal article supplement (PMC6548728; doi:10.1098/rsbl.2019.0068), 2019-05-15
Supplement: rsbl20190068supp1.pdf [file rsbl20190068supp1.pdf]

(a)

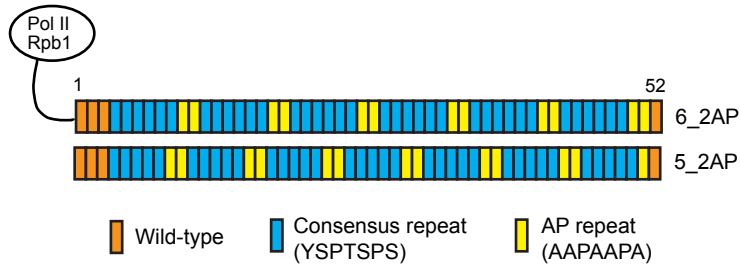

(b)

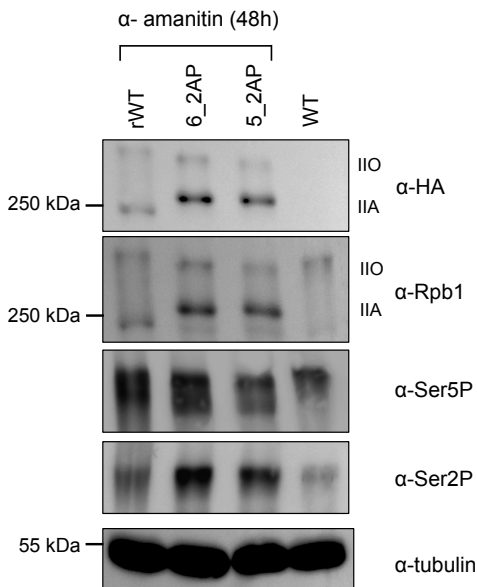

(c)

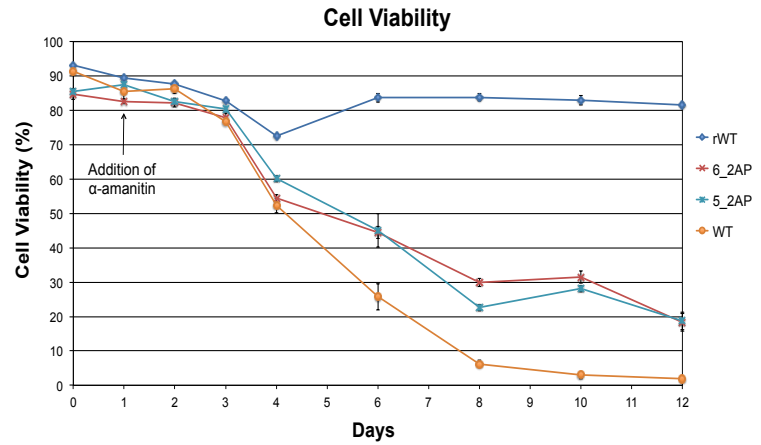

(d)

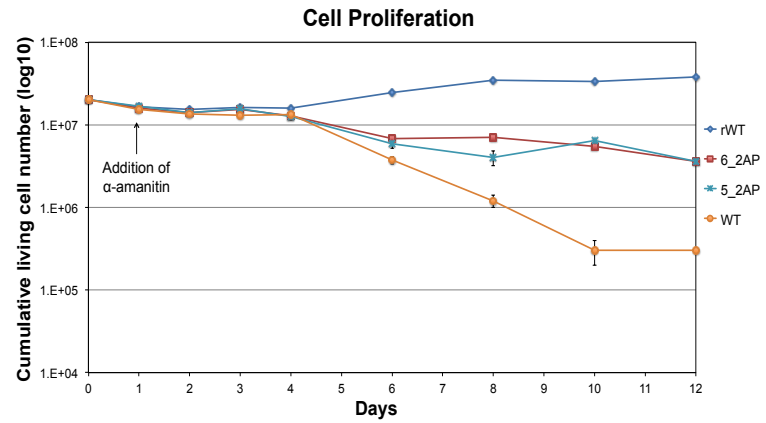

Supplementary Figure S1. (a) Schematic representation of CTD mutants with two AP-spacers between arrays of MFUs. (b) Western blot analysis and graphs representing the percentage of cell viability (c) and cell proliferation (d) as described in figure legends 1 and 2 (n = 2).

### Electronic Supplementary Figure S1

Manuscript Title: Extension of the Minimal Functional Unit of the RNA Polymerase II CTD from yeast to mammalian cells  
 Authors: Nilay Shah, Tim-Michael Decker and Dirk Eick
